# Supplementary material for: Molecular mechanism of the anti-inflammatory effects of Sophorae Flavescentis Aiton identified by network pharmacology
Source: PubMed Central journal article supplement (PMC7806711; doi:10.1038/s41598-020-80297-y), 2021-01-13

**Molecular mechanism of the anti-inflammatory  
effects of Sophorae Flavescents Aiton identified by  
network pharmacology**

**Supplemental Materials**

**Authors: Naiqiang Zhu, Jingyi Hou**

## Supplementary Material 1 Targets of bioactive compounds of Kushen.

### Target

ADCY2

AKT1

APP

AR

BCL2L1

BIRC5

CASP3

CASP7

CCND1

CD40LG

CDK2

CDK4

CDKN1A

EGFR

ERBB2

GSTP1

HMOX1

ICAM1

IFNG

IL10

IL2

IL4

IL6

INSR

JUN

MAPK1

MAPK3

MCL1

MDM2

MET

MMP1

MMP2

MMP9

NFKBIA

NOS2

PCNA

PPARG

PRSS1

PTGS1

PTGS2

RB1

RELA

**Target**

TNF

TOP1

TOP2A

TP53

TYR

VEGFA

XDH

XIAP

CCNB1

CASP9

SLC2A4

PTGES

NUF2

ABCB1

ABCC1

ABCC2

ABCG2

ACTB

AHR

AKR1C1

ALB

ATP5A1

ATP5B

ATP5C1

CA1

CA12

CA14

CA2

CA3

CA4

CA5A

CA5B

CA6

CA7

CA9

CBR1

CDK6

CEBPB

COMT

CSNK2A1

CSNK2B

CYP19A1

**Target**

CYP1A1  
CYP1A2  
CYP1B1  
CYP2C8  
CYP2E1  
EIF3F  
ESR1  
ESR2  
ESRRA  
ESRRB  
GPER  
HCK  
HIBCH  
HSP90AA1  
HSPA2  
IGHG1  
JAK1  
KIAA1310  
MTTP  
NCOA1  
NCOA2  
NQO2  
NR1I2  
PIK3CG  
PIM1  
PRKACA  
PRKCA  
PRKCB  
PTK2B  
RUVBL2  
SF3B3  
SHBG  
SLC16A1  
SLC16A7  
SLC22A11  
SLC22A6  
SLCO2B1  
SOAT1  
SOAT2  
SQLE  
STK17B  
SYK  
**Target**  
TTR

UBA1  
UGT3A1  
CALM3  
CCNA2  
GSK3B  
KCNH2  
KDR  
RXRA  
SCN5A  
CHRNA3  
CHRNA4  
CHRNA6  
CHRNA7  
CHRNA7  
CHRNA7  
CHRNA7  
CHRNA7  
CHRNA7  
CHRNA7  
CHRNA7  
CYP2D6  
CYP3A4  
HTR3A  
TNF  
CXCL8  
ACACA  
ACHE  
ACPP  
ADRB2  
AKR1B1  
ALOX5  
BCL2  
BMP2  
CASP8  
CAT  
CAV1  
CCL2  
CDKN2A  
CHEK2  
CHUK  
COL1A1  
COL3A1  
CRP  
CTSD  
CXCL10  
DUOX2  
EGF  
EIF6  
ERBB3  
F3

FOS  
GJA1  
GSTM1  
GSTM2  
HIF1A  
HSF1  
HSPA5  
HSPB1  
IGF2  
IGFBP3  
IL1A  
IL1B  
IRF1  
MAOB  
MGAM  
MMP3  
MPO  
MYC  
NCF1  
NOS3  
NPEPPS  
NQO1  
NR1I3  
ODC1  
PARP1  
PLAT  
PLAU  
PON1  
POR  
PPARA  
PPARD  
PTEN  
PTGER3  
RAF1  
RASA1  
RASSF1  
RUNX2  
SELE  
SERPINE1  
SOD1  
STAT1  
SULT1E1  
TGFB1  
THBD

VCAM1  
ELK1  
BAX  
DIO1  
E2F1  
E2F2  
CLDN4  
RUNX1T1  
HAS2  
HK2  
CXCL2  
NFE2L2  
NKX3-1  
CXCL11  
PCOLCE  
PSMD3  
SOD3  
SPP1  
AHSA1  
DCAF5  
HERC5  
PRXC1A  
CDC2  
SEC14L3  
PPP2CB  
CNR1  
SERPINE2  
SREBF1  
ABCB4  
AFM  
PPP2CA  
SEC14L2  
CHGA  
SLC2A1  
PTPN2  
PKP3  
ABCG1  
DGKA  
SEC14L6  
JUP  
CCL3  
TTPA  
PRKCG  
REST

CNR2  
FGF1  
PRKAA1  
NF2  
SEC14L4  
PKP2  
SOCS1  
PPP2R1A  
RXRA  
CYP3A5  
CYP3A7  
CYP2C19  
CYP3A43  
AAGAB  
ADRA1A  
ADRA2A  
ADRB1  
AKR1C3  
APC  
BAD  
CCND2  
CD44  
CHRM1  
CYCS  
FCER2  
FXD2  
G6PC  
GRIA2  
HSD3B1  
HSD3B2  
IER3IP1  
IGF1R  
IKBKG  
IL13  
INS  
MAOA  
MS4A2  
MT-ND6  
NR3C1  
NR3C2  
OPRM1  
PGR  
RXRB  
SIRT1



SLC5A5  
SLC6A2  
SLC6A3  
SLC6A4  
TYRP1  
DCT  
ALPI  
TRPM2  
PSME3  
CFLAR  
EEF1E1  
HPSE  
ALG5  
AWAT1  
HTR4  
GGCX  
HTR1A  
AGTR1  
AVP  
WLS  
PCK1  
CSF1  
FNDC5  
SLC38A3  
RXFP4  
MAPK9  
MC4R  
MTNR1B  
MAS1  
S1PR2  
HEG1  
CDH5  
KCNK4  
HTR3D  
ANAPC2  
BICD1  
RET  
SOD2  
STATH  
TMBIM6  
SNCA  
ADORA1  
CCM2L  
GABRA2

HTR1B  
F10  
AGTR2  
VKORC1L1  
PAX2  
GPR27  
ADCY6  
IL34  
ACIN1  
CCL5  
METRNL  
LILRB1  
CYP4F2  
PPP1R1B  
BMP6  
EGR1  
AGTRAP  
TFPI  
ARRB1  
NEUROD2  
WNT11  
ACSL4  
LRRK2  
MC5R  
HTR3E  
NAPRT  
NCK1  
ALOX15  
PROS1  
GABRA3  
VKORC1  
BGLAP  
F2  
DAB2  
SERPINB7  
NAMPT  
C1QTNF1  
ANG  
WT1  
PLA2R1  
PPP1R9B  
PKD2  
CRHBP  
HTN1

SERPINF2  
OXTR  
CCS  
AIF1  
NMUR2  
RPS6KA2  
CDC20  
MC3R  
DRD5  
MECOM  
ADIPOQ  
ANXA1  
HTR3C  
PROZ  
F7  
GABRA1  
AGT  
MGP  
ACTN2  
RGCC  
MC2R  
CD36  
HNF1B  
CLDN5  
HTR2B  
AQP2  
CYP11A1  
ACE2  
SIPA1  
SPRY1  
GAS6  
PPP1R15A  
UTS2R  
BDKRB2  
CD47  
SPX  
THRB  
HTR3B  
RFK  
AGER  
CPLX2  
UBIAD1  
GLRA1  
AVPR1A

F9  
PROC  
AVPR2  
CBR4  
NDRG2  
HACD1  
UTS2  
SDC4  
OXT  
DCSTAMP  
MC1R  
PTGIS  
CYP4F11  
AMELX  
HRH3  
CTNNBIP1  
PLA2G1B  
ACVR2A  
HCRT  
ACE  
ALOX15B  
UGT3A2  
REN  
SPRY2  
NCK2  
FGA  
AVPR1B  
PRDM16  
DRD2  
PAWR

## Supplementary Materials 2 Targets of inflammation

**Target Source**

A4GNT OMIM,Genecards, Gene  
ABCB1 OMIM,Genecards, Gene  
ACE2 OMIM,Genecards, Gene  
ACKR1 OMIM,Genecards, Gene  
ACKR2 OMIM,Genecards, Gene  
ACKR3 OMIM,Genecards, Gene  
ACP5 OMIM,Genecards, Gene  
ACVR1 OMIM,Genecards, Gene  
ADA OMIM,Genecards, Gene  
ADAMTS12 OMIM,Genecards, Gene  
ADAR OMIM,Genecards, Gene  
ADCYAP1 OMIM,Genecards, Gene  
ADGRE2 OMIM,Genecards, Gene  
ADIPOQ OMIM,Genecards, Gene  
ADIPOR1 OMIM,Genecards, Gene  
ADIPOR2 OMIM,Genecards, Gene  
ADORA1OMIM,Genecards, Gene  
ADORA2A OMIM,Genecards, Gene  
AGER OMIM,Genecards, Gene  
AGTOMIM,Genecards, Gene  
AHROMIM,Genecards, Gene  
AIM2 OMIM,Genecards, Gene  
AIMP1 OMIM,Genecards, Gene  
AKT1 OMIM,Genecards, Gene  
ALOX5 OMIM,Genecards, Gene  
ALPK1 OMIM,Genecards, Gene  
ANG OMIM,Genecards, Gene  
ANGPT1 OMIM,Genecards, Gene  
ANGPT2 OMIM,Genecards, Gene  
ANXA1 OMIM,Genecards, Gene  
APP OMIM,Genecards, Gene  
ARG1 OMIM,Genecards, Gene  
ATG16L1 OMIM,Genecards, Gene  
ATG5 OMIM,Genecards, Gene  
AXL OMIM,Genecards, Gene  
BACH2 OMIM,Genecards, Gene  
BCL6 OMIM,Genecards, Gene  
BDKRB1 OMIM,Genecards, Gene  
BDKRB2 OMIM,Genecards, Gene  
BDNF OMIM,Genecards, Gene  
BMP2 OMIM,Genecards, Gene  
BTLA OMIM,Genecards, Gene

**Target Source**

C1QBP OMIM,Genecards, Gene  
C3 OMIM,Genecards, Gene  
C5 OMIM,Genecards, Gene  
C5AR1 OMIM,Genecards, Gene  
C5AR2 OMIM,Genecards, Gene  
CACNA1C OMIM,Genecards, Gene  
CAMP OMIM,Genecards, Gene  
CAPN5 OMIM,Genecards, Gene  
CARD8 OMIM,Genecards, Gene  
CASP1 OMIM,Genecards, Gene  
CASP8 OMIM,Genecards, Gene  
CAV1 OMIM,Genecards, Gene  
CCL11 OMIM,Genecards, Gene  
CCL13 OMIM,Genecards, Gene  
CCL18 OMIM,Genecards, Gene  
CCL19 OMIM,Genecards, Gene  
CCL2 OMIM,Genecards, Gene  
CCL20 OMIM,Genecards, Gene  
CCL21 OMIM,Genecards, Gene  
CCL22 OMIM,Genecards, Gene  
CCL27 OMIM,Genecards, Gene  
CCL3 OMIM,Genecards, Gene  
CCL5 OMIM,Genecards, Gene  
CCL7 OMIM,Genecards, Gene  
CCR1 OMIM,Genecards, Gene  
CCR10 OMIM,Genecards, Gene  
CCR2 OMIM,Genecards, Gene  
CCR3 OMIM,Genecards, Gene  
CCR4 OMIM,Genecards, Gene  
CCR5 OMIM,Genecards, Gene  
CCR6 OMIM,Genecards, Gene  
CCR8 OMIM,Genecards, Gene  
CCR9 OMIM,Genecards, Gene  
CD14 OMIM,Genecards, Gene  
CD163 OMIM,Genecards, Gene  
CD1D OMIM,Genecards, Gene  
CD300LF OMIM,Genecards, Gene  
CD4 OMIM,Genecards, Gene  
CD40 OMIM,Genecards, Gene  
CD44 OMIM,Genecards, Gene  
CD80 OMIM,Genecards, Gene  
CD99 OMIM,Genecards, Gene  
CDH11 OMIM,Genecards, Gene  
CDH26 OMIM,Genecards, Gene

CDK5 OMIM,Genecards, Gene  
CERK OMIM,Genecards, Gene  
CFB OMIM,Genecards, Gene  
CFH OMIM,Genecards, Gene  
CFTR OMIM,Genecards, Gene  
CHI3L1 OMIM,Genecards, Gene  
CHRNA7 OMIM,Genecards, Gene  
CHUK OMIM,Genecards, Gene  
CLEC10A OMIM,Genecards, Gene  
CLEC4D OMIM,Genecards, Gene  
CLEC4E OMIM,Genecards, Gene  
CLEC5A OMIM,Genecards, Gene  
CLU OMIM,Genecards, Gene  
CMA1 OMIM,Genecards, Gene  
CMKLR1 OMIM,Genecards, Gene  
CNR1 OMIM,Genecards, Gene  
CNR2 OMIM,Genecards, Gene  
CPB2 OMIM,Genecards, Gene  
CR1 OMIM,Genecards, Gene  
CRH OMIM,Genecards, Gene  
CRP OMIM,Genecards, Gene  
CRYAB OMIM,Genecards, Gene  
CSF1 OMIM,Genecards, Gene  
CSF2 OMIM,Genecards, Gene  
CST9 OMIM,Genecards, Gene  
CTLA4 OMIM,Genecards, Gene  
CTNND1 OMIM,Genecards, Gene  
CTSG OMIM,Genecards, Gene  
CTSK OMIM,Genecards, Gene  
CX3CL1 OMIM,Genecards, Gene  
CX3CR1 OMIM,Genecards, Gene  
CXCL10 OMIM,Genecards, Gene  
CXCL11 OMIM,Genecards, Gene  
CXCL12 OMIM,Genecards, Gene  
CXCL13 OMIM,Genecards, Gene  
CXCL14 OMIM,Genecards, Gene  
CXCL2 OMIM,Genecards, Gene  
CXCR1 OMIM,Genecards, Gene  
CXCR2 OMIM,Genecards, Gene  
CXCR3 OMIM,Genecards, Gene  
CXCR4 OMIM,Genecards, Gene  
  
CXCR6 OMIM,Genecards, Gene  
CYBB OMIM,Genecards, Gene



CYP4F2 OMIM,Genecards, Gene  
CYP4F3 OMIM,Genecards, Gene  
CYSLTR1 OMIM,Genecards, Gene  
CYSLTR2 OMIM,Genecards, Gene  
CYTH2 OMIM,Genecards, Gene  
DDIT3 OMIM,Genecards, Gene  
DDIT4 OMIM,Genecards, Gene  
DEFA5 OMIM,Genecards, Gene  
DEFB1 OMIM,Genecards, Gene  
DEFB4A OMIM,Genecards, Gene  
DPP4 OMIM,Genecards, Gene  
DUSP1 OMIM,Genecards, Gene  
EBI3 OMIM,Genecards, Gene  
EDIL3 OMIM,Genecards, Gene  
EDN1 OMIM,Genecards, Gene  
EGFR OMIM,Genecards, Gene  
EIF2AK2 OMIM,Genecards, Gene  
ELANE OMIM,Genecards, Gene  
ENTPD1 OMIM,Genecards, Gene  
EOMES OMIM,Genecards, Gene  
EPO OMIM,Genecards, Gene  
EREG OMIM,Genecards, Gene  
ETS1 OMIM,Genecards, Gene  
F10 OMIM,Genecards, Gene  
F12 OMIM,Genecards, Gene  
F2R OMIM,Genecards, Gene  
F2RL1 OMIM,Genecards, Gene  
F3 OMIM,Genecards, Gene  
FABP4 OMIM,Genecards, Gene  
FADD OMIM,Genecards, Gene  
FAS OMIM,Genecards, Gene  
FASLG OMIM,Genecards, Gene  
FASN OMIM,Genecards, Gene  
FCER1A OMIM,Genecards, Gene  
FCGR2B OMIM,Genecards, Gene  
FCGR3A OMIM,Genecards, Gene  
FERMT1 OMIM,Genecards, Gene  
FETUB OMIM,Genecards, Gene  
FFAR2 OMIM,Genecards, Gene  
FFAR4 OMIM,Genecards, Gene  
FLG OMIM,Genecards, Gene  
FLT1 OMIM,Genecards, Gene  
FOXP3 OMIM,Genecards, Gene  
FPR1 OMIM,Genecards, Gene

FPR2 OMIM,Genecards, Gene  
GATA4 OMIM,Genecards, Gene  
GATA6 OMIM,Genecards, Gene  
GCG OMIM,Genecards, Gene  
GCH1 OMIM,Genecards, Gene  
GDF15 OMIM,Genecards, Gene  
GHRL OMIM,Genecards, Gene  
GHSR OMIM,Genecards, Gene  
GJA1 OMIM,Genecards, Gene  
GRN OMIM,Genecards, Gene  
GSNOMIM,Genecards, Gene  
GSTM1 OMIM,Genecards, Gene  
GSTP1 OMIM,Genecards, Gene  
GUCA2BOMIM,Genecards, Gene  
HAMP OMIM,Genecards, Gene  
HAVCR1 OMIM,Genecards, Gene  
HCAR2 OMIM,Genecards, Gene  
HIF1A OMIM,Genecards, Gene  
HMGB1 OMIM,Genecards, Gene  
HMOX1 OMIM,Genecards, Gene  
HPGD OMIM,Genecards, Gene  
HRH1 OMIM,Genecards, Gene  
HRH2 OMIM,Genecards, Gene  
HS6ST3 OMIM,Genecards, Gene  
HSPA1A OMIM,Genecards, Gene  
HSPB1 OMIM,Genecards, Gene  
ICAM3 OMIM,Genecards, Gene  
ICOS OMIM,Genecards, Gene  
ICOSLG OMIM,Genecards, Gene  
IDO1 OMIM,Genecards, Gene  
IFNG OMIM,Genecards, Gene  
IGF1 OMIM,Genecards, Gene  
IKBKB OMIM,Genecards, Gene  
IKBKE OMIM,Genecards, Gene  
IKBKG OMIM,Genecards, Gene  
IL10OMIM,Genecards, Gene  
IL11OMIM,Genecards, Gene  
IL13OMIM,Genecards, Gene  
IL15OMIM,Genecards, Gene  
IL16OMIM,Genecards, Gene  
IL18OMIM,Genecards, Gene  
IL1A OMIM,Genecards, Gene  
IL1BOMIM,Genecards, Gene  
IL2 OMIM,Genecards, Gene

IL21OMIM,Genecards, Gene  
IL22OMIM,Genecards, Gene  
IL22RA1 OMIM,Genecards, Gene  
IL23A OMIM,Genecards, Gene  
IL24OMIM,Genecards, Gene  
IL27OMIM,Genecards, Gene  
IL2RA OMIM,Genecards, Gene  
IL2RB OMIM,Genecards, Gene  
IL31OMIM,Genecards, Gene  
IL32OMIM,Genecards, Gene  
IL33OMIM,Genecards, Gene  
IL36A OMIM,Genecards, Gene  
IL36B OMIM,Genecards, Gene  
IL36G OMIM,Genecards, Gene  
IL36RN OMIM,Genecards, Gene  
IL4 OMIM,Genecards, Gene  
IL5 OMIM,Genecards, Gene  
IL6 OMIM,Genecards, Gene  
IL9 OMIM,Genecards, Gene  
IRAK3 OMIM,Genecards, Gene  
IRF5 OMIM,Genecards, Gene  
ISG15 OMIM,Genecards, Gene  
ITGA1 OMIM,Genecards, Gene  
ITGAM OMIM,Genecards, Gene  
ITGB1 OMIM,Genecards, Gene  
ITGB2 OMIM,Genecards, Gene  
JUN OMIM,Genecards, Gene  
JUND OMIM,Genecards, Gene  
KDR OMIM,Genecards, Gene  
KLRB1 OMIM,Genecards, Gene  
KLRK1 OMIM,Genecards, Gene  
KMT2A OMIM,Genecards, Gene  
LBP OMIM,Genecards, Gene  
LCN2 OMIM,Genecards, Gene  
LEP OMIM,Genecards, Gene  
LGALS2 OMIM,Genecards, Gene  
LGALS3 OMIM,Genecards, Gene  
LGR5 OMIM,Genecards, Gene  
LST1 OMIM,Genecards, Gene  
LTB4R OMIM,Genecards, Gene  
LTB4R2 OMIM,Genecards, Gene  
LTBR OMIM,Genecards, Gene  
MAP3K14 OMIM,Genecards, Gene  
MAP3K3OMIM,Genecards, Gene

MAP3K8 OMIM, Genecards, Gene  
MAP4K4 OMIM, Genecards, Gene  
MAPK14 OMIM, Genecards, Gene  
MAPK8 OMIM, Genecards, Gene  
MAVS OMIM, Genecards, Gene  
MAZ OMIM, Genecards, Gene  
MEFV OMIM, Genecards, Gene  
MEP1B OMIM, Genecards, Gene  
MERTK OMIM, Genecards, Gene  
MIF OMIM, Genecards, Gene  
MITF OMIM, Genecards, Gene  
MMP12 OMIM, Genecards, Gene  
MMP2 OMIM, Genecards, Gene  
MMP9 OMIM, Genecards, Gene  
MPO OMIM, Genecards, Gene  
MST1R OMIM, Genecards, Gene  
MUC5AC OMIM, Genecards, Gene  
MUC5B OMIM, Genecards, Gene  
MVK OMIM, Genecards, Gene  
MYD88 OMIM, Genecards, Gene  
NAMPT OMIM, Genecards, Gene  
NCF1 OMIM, Genecards, Gene  
NCR3 OMIM, Genecards, Gene  
NFE2L1 OMIM, Genecards, Gene  
NFE2L2 OMIM, Genecards, Gene  
NFKB1 OMIM, Genecards, Gene  
NFKBIA OMIM, Genecards, Gene  
NFKBIZ OMIM, Genecards, Gene  
NLRC4 OMIM, Genecards, Gene  
NLRP1 OMIM, Genecards, Gene  
NLRP2 OMIM, Genecards, Gene  
NLRP3 OMIM, Genecards, Gene  
NLRX1 OMIM, Genecards, Gene  
NOD1 OMIM, Genecards, Gene  
NOD2 OMIM, Genecards, Gene  
NOTCH1 OMIM, Genecards, Gene  
NOX1 OMIM, Genecards, Gene  
NR1H2 OMIM, Genecards, Gene  
NR1H3 OMIM, Genecards, Gene  
NR3C1 OMIM, Genecards, Gene  
NR4A2 OMIM, Genecards, Gene  
NR5A2 OMIM, Genecards, Gene  
OCLN OMIM, Genecards, Gene  
OPTN OMIM, Genecards, Gene

OTULIN OMIM,Genecards, Gene  
P2RX7 OMIM,Genecards, Gene  
P2RY6 OMIM,Genecards, Gene  
PARP1 OMIM,Genecards, Gene  
PDCD1 OMIM,Genecards, Gene  
PDPN OMIM,Genecards, Gene  
PECAM1OMIM,Genecards, Gene  
PF4 OMIM,Genecards, Gene  
PGF OMIM,Genecards, Gene  
PIK3CG OMIM,Genecards, Gene  
PIN1 OMIM,Genecards, Gene  
PLA2G3 OMIM,Genecards, Gene  
PLA2G4A OMIM,Genecards, Gene  
PLA2G7 OMIM,Genecards, Gene  
PLG OMIM,Genecards, Gene  
PON1 OMIM,Genecards, Gene  
PON3 OMIM,Genecards, Gene  
PPARA OMIM,Genecards, Gene  
PPARD OMIM,Genecards, Gene  
PPARG OMIM,Genecards, Gene  
PRKAA1 OMIM,Genecards, Gene  
PRKCD OMIM,Genecards, Gene  
PROC OMIM,Genecards, Gene  
PROK2 OMIM,Genecards, Gene  
PROS1 OMIM,Genecards, Gene  
PRTN3 OMIM,Genecards, Gene  
PTEN OMIM,Genecards, Gene  
PTGDR2 OMIM,Genecards, Gene  
PTGER3 OMIM,Genecards, Gene  
PTGER4 OMIM,Genecards, Gene  
PTGIR OMIM,Genecards, Gene  
PTGS1 OMIM,Genecards, Gene  
PTGS2 OMIM,Genecards, Gene  
PTPN6 OMIM,Genecards, Gene  
PYCARD OMIM,Genecards, Gene  
RAC1 OMIM,Genecards, Gene  
RALBP1 OMIM,Genecards, Gene  
RB1 OMIM,Genecards, Gene  
RC3H1 OMIM,Genecards, Gene  
REG1A OMIM,Genecards, Gene  
REG4 OMIM,Genecards, Gene  
RELA OMIM,Genecards, Gene  
RETN OMIM,Genecards, Gene  
RIPK1 OMIM,Genecards, Gene

RIPK3 OMIM,Genecards, Gene  
RIPK4 OMIM,Genecards, Gene  
ROCK1 OMIM,Genecards, Gene  
RORC OMIM,Genecards, Gene  
RUNX3 OMIM,Genecards, Gene  
S100A12 OMIM,Genecards, Gene  
S100A8 OMIM,Genecards, Gene  
S100A9 OMIM,Genecards, Gene  
S1PR1 OMIM,Genecards, Gene  
SAMHD1 OMIM,Genecards, Gene  
SCGB1A1 OMIM,Genecards, Gene  
SCGB3A2 OMIM,Genecards, Gene  
SELE OMIM,Genecards, Gene  
SELL OMIM,Genecards, Gene  
SELP OMIM,Genecards, Gene  
SELPLG OMIM,Genecards, Gene  
SEMA7AOMIM,Genecards, Gene  
SERPINA1 OMIM,Genecards, Gene  
SERPINB2 OMIM,Genecards, Gene  
SERPINB3 OMIM,Genecards, Gene  
SERPINB4 OMIM,Genecards, Gene  
SFTPA1 OMIM,Genecards, Gene  
SFTPD OMIM,Genecards, Gene  
SGK1 OMIM,Genecards, Gene  
SIGIRR OMIM,Genecards, Gene  
SLC11A2 OMIM,Genecards, Gene  
SLC22A5 OMIM,Genecards, Gene  
SMAD4 OMIM,Genecards, Gene  
SOCS1 OMIM,Genecards, Gene  
SOCS3 OMIM,Genecards, Gene  
SPINK1 OMIM,Genecards, Gene  
SPP1 OMIM,Genecards, Gene  
SRC OMIM,Genecards, Gene  
SST OMIM,Genecards, Gene  
ST14 OMIM,Genecards, Gene  
STAT1 OMIM,Genecards, Gene  
STAT3 OMIM,Genecards, Gene  
STAT4 OMIM,Genecards, Gene  
STAT6 OMIM,Genecards, Gene  
STK11 OMIM,Genecards, Gene  
TAC1 OMIM,Genecards, Gene  
TAP2 OMIM,Genecards, Gene  
TBX21 OMIM,Genecards, Gene  
TET2 OMIM,Genecards, Gene

TFRC OMIM,Genecards, Gene  
TGFB1 OMIM,Genecards, Gene  
TGFB2 OMIM,Genecards, Gene  
TICAM1 OMIM,Genecards, Gene  
TIE1OMIM,Genecards, Gene  
TIMP3 OMIM,Genecards, Gene  
TIRAP OMIM,Genecards, Gene  
TLR1 OMIM,Genecards, Gene  
TLR2 OMIM,Genecards, Gene  
TLR3 OMIM,Genecards, Gene  
TLR4 OMIM,Genecards, Gene  
TLR5 OMIM,Genecards, Gene  
TLR7 OMIM,Genecards, Gene  
TLR9 OMIM,Genecards, Gene  
TNCOMIM,Genecards, Gene  
TNF OMIM,Genecards, Gene  
TP53 OMIM,Genecards, Gene  
TP63 OMIM,Genecards, Gene  
TRAF1 OMIM,Genecards, Gene  
TRAF3IP2 OMIM,Genecards, Gene  
TRAF6 OMIM,Genecards, Gene  
TREM1 OMIM,Genecards, Gene  
TREM2 OMIM,Genecards, Gene  
TRIM27 OMIM,Genecards, Gene  
TRPA1 OMIM,Genecards, Gene  
TRPM2 OMIM,Genecards, Gene  
TRPM8 OMIM,Genecards, Gene  
TRPV1 OMIM,Genecards, Gene  
TSC22D3 OMIM,Genecards, Gene  
TSLP OMIM,Genecards, Gene  
TYRO3 OMIM,Genecards, Gene  
TYROBP OMIM,Genecards, Gene  
VDROMIM,Genecards, Gene  
VEGFA OMIM,Genecards, Gene  
VEGFB OMIM,Genecards, Gene  
VLDLR OMIM,Genecards, Gene  
WWTR1 OMIM,Genecards, Gene  
XBP1 OMIM,Genecards, Gene  
YAP1 OMIM,Genecards, Gene  
ZFP36 OMIM,Genecards, Gene

Supplementary Material 3. The fuller-length originals of Western blot

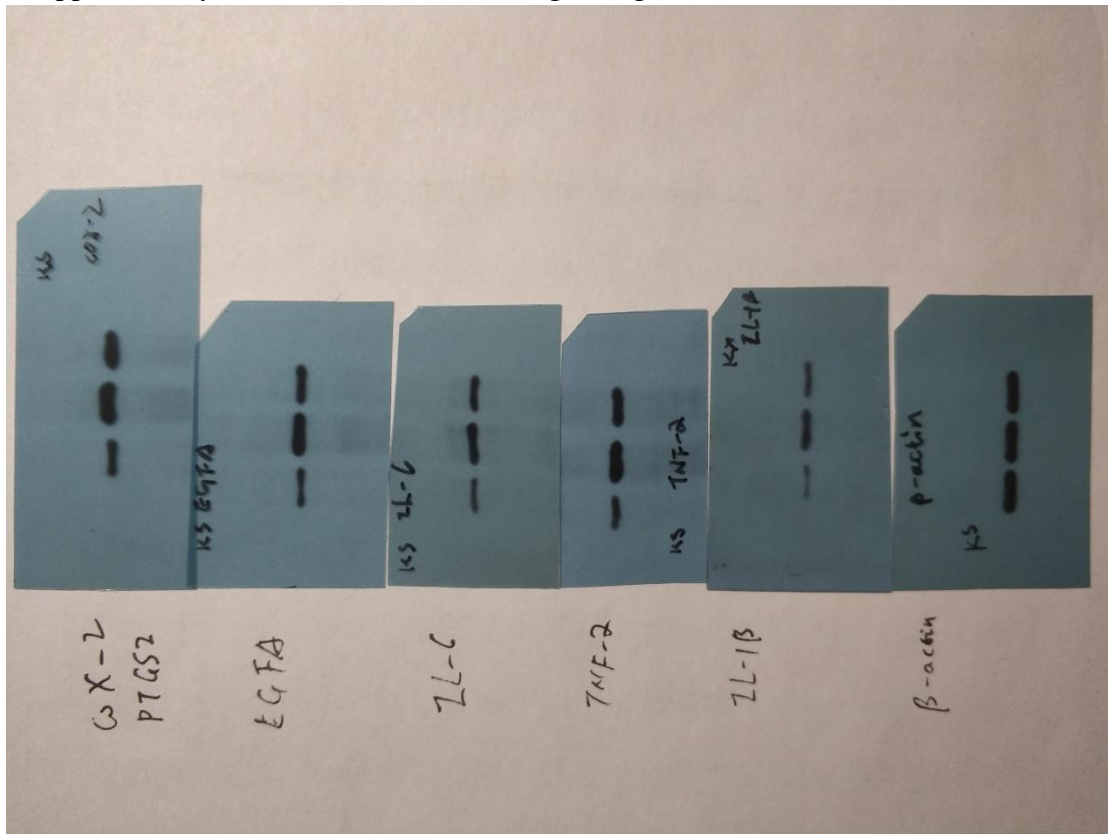

Supplement: 41598_2020_80297_MOESM1_ESM.pdf [file 41598_2020_80297_MOESM1_ESM.pdf]
